# Supplementary material for: Lack of ownership of mobile phones could hinder the rollout of mHealth interventions in Africa
Source: eLife journal article supplement (doi:10.7554/elife.79615), 2022-10-04
Supplement: supp [file elife-79615-supp-v1.zip › elife_poa_e79615_Figure_1_figure_supplement_1.pdf]

R7 Afrobarometer survey  
data from 33 countries  
(*n* = 44,224)

Personally owns  
mobile phone  
(*n* = 35,685)

Someone else in  
household owns  
mobile phone  
(*n* = 3,383)

No one in  
household owns  
mobile phone  
(*n* = 4,903)

Don't know or  
refuse to answer  
(*n* = 253)

Owns  
Smartphone  
(*n* = 16,830)

Owns Basic  
phone  
(*n* = 18,603)

Don't know or  
refuse to answer  
(*n* = 252)
