# Supplementary figures and images for: Lack of ownership of mobile phones could hinder the rollout of mHealth interventions in Africa
Source: eLife journal article supplement (doi:10.7554/elife.79615), 2022-10-04

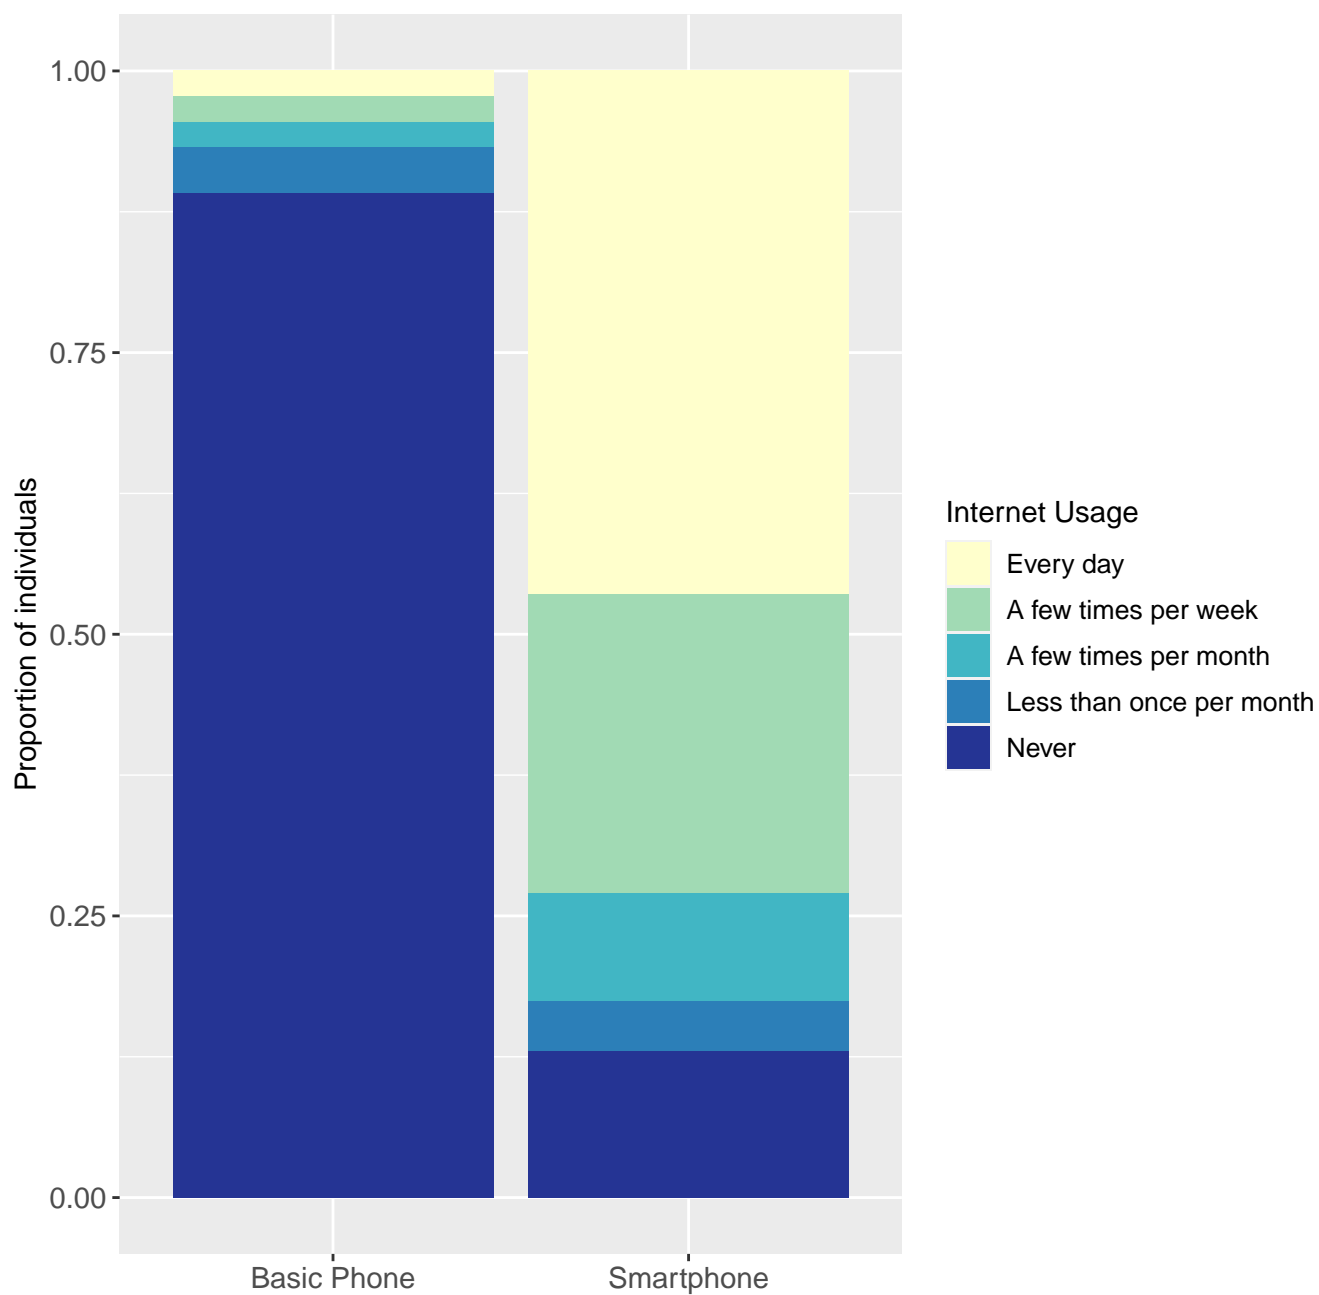

Supplement: supp [file elife-79615-supp-v1.zip › elife_poa_e79615_Figure_1_figure_supplement_2.pdf]

**A)**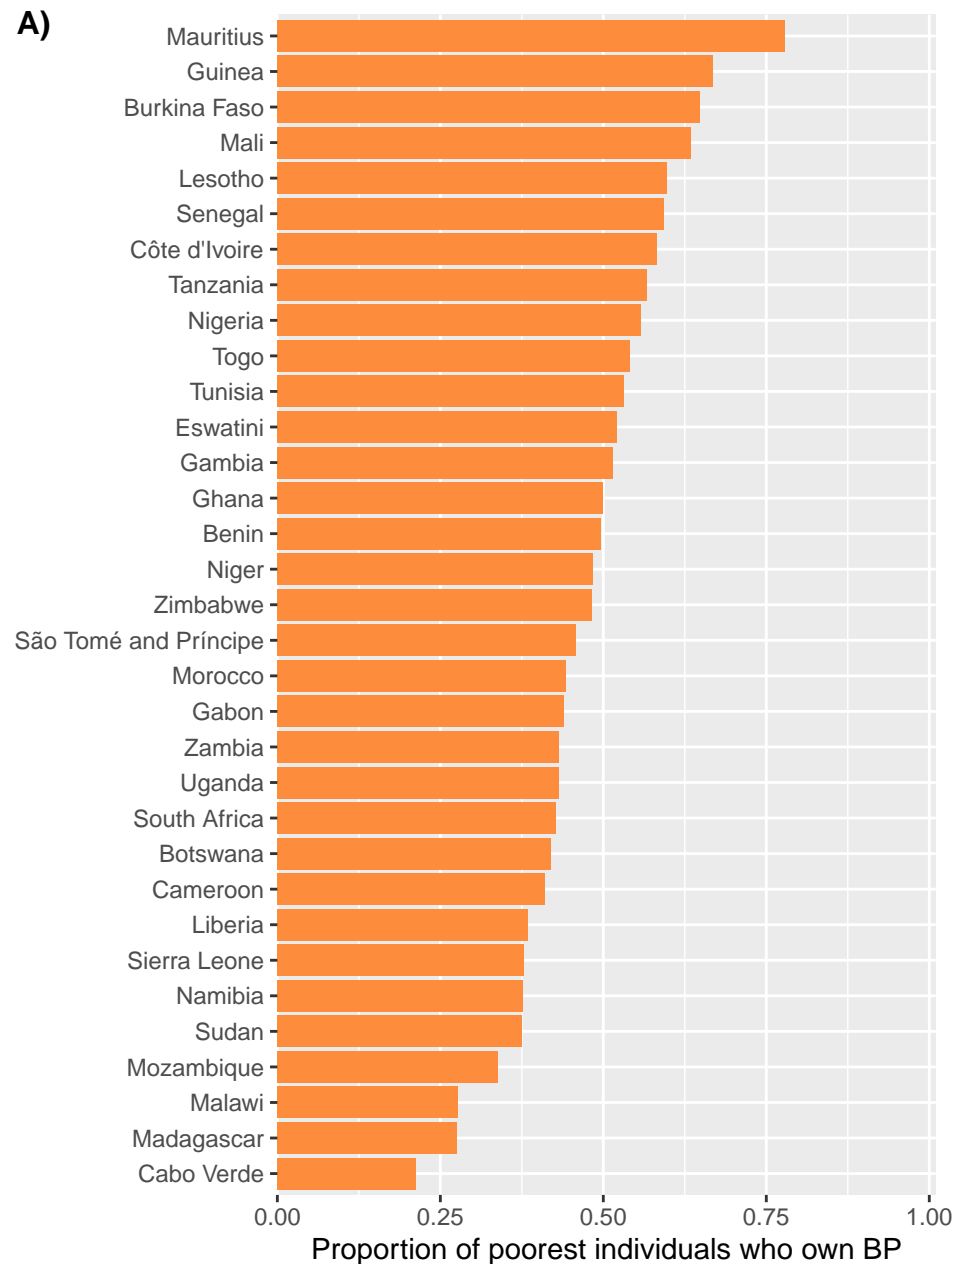**B)**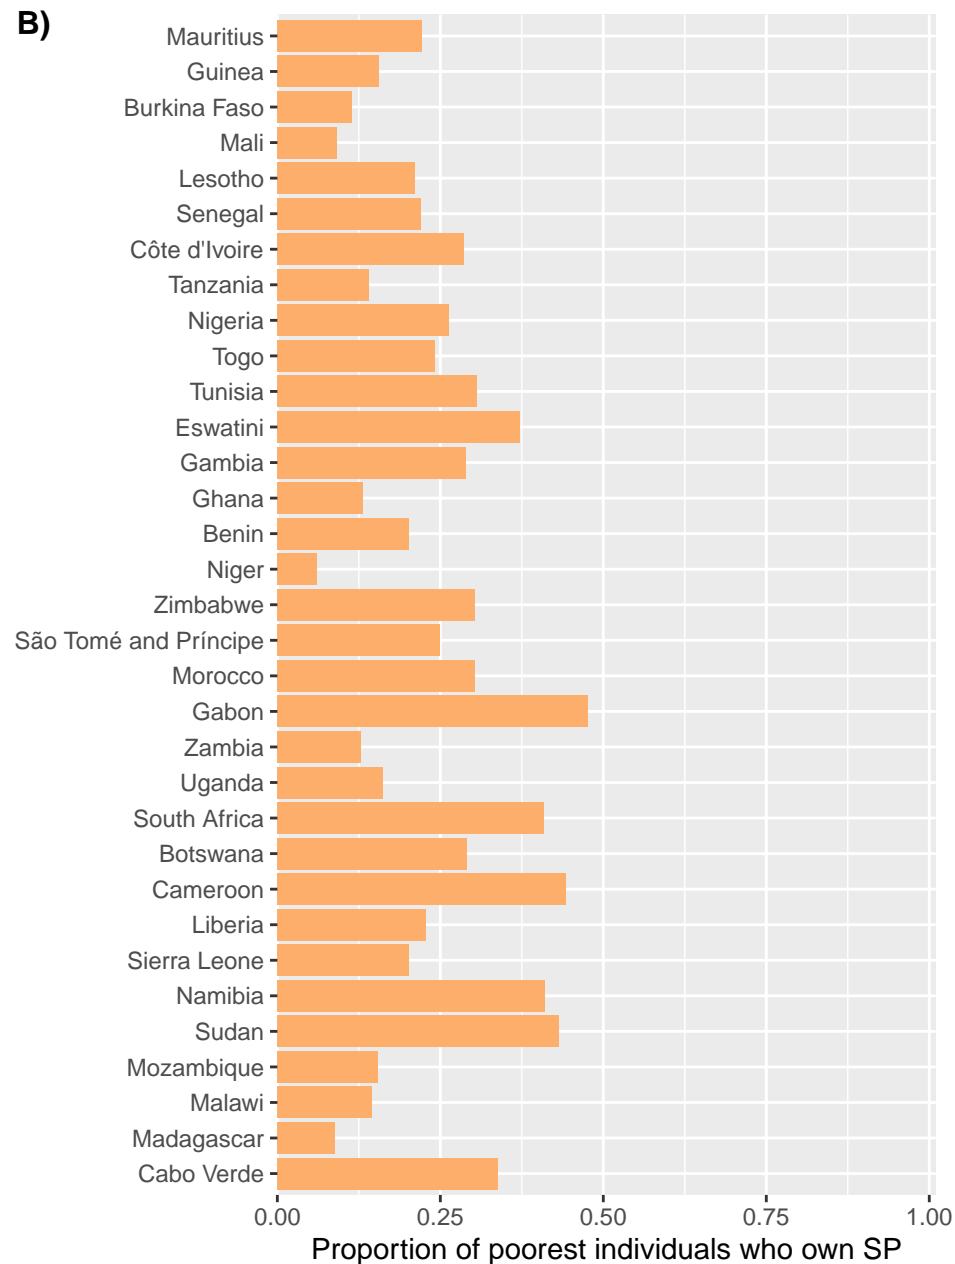

Supplement: supp [file elife-79615-supp-v1.zip › elife_poa_e79615_Figure_1_figure_supplement_3.pdf]

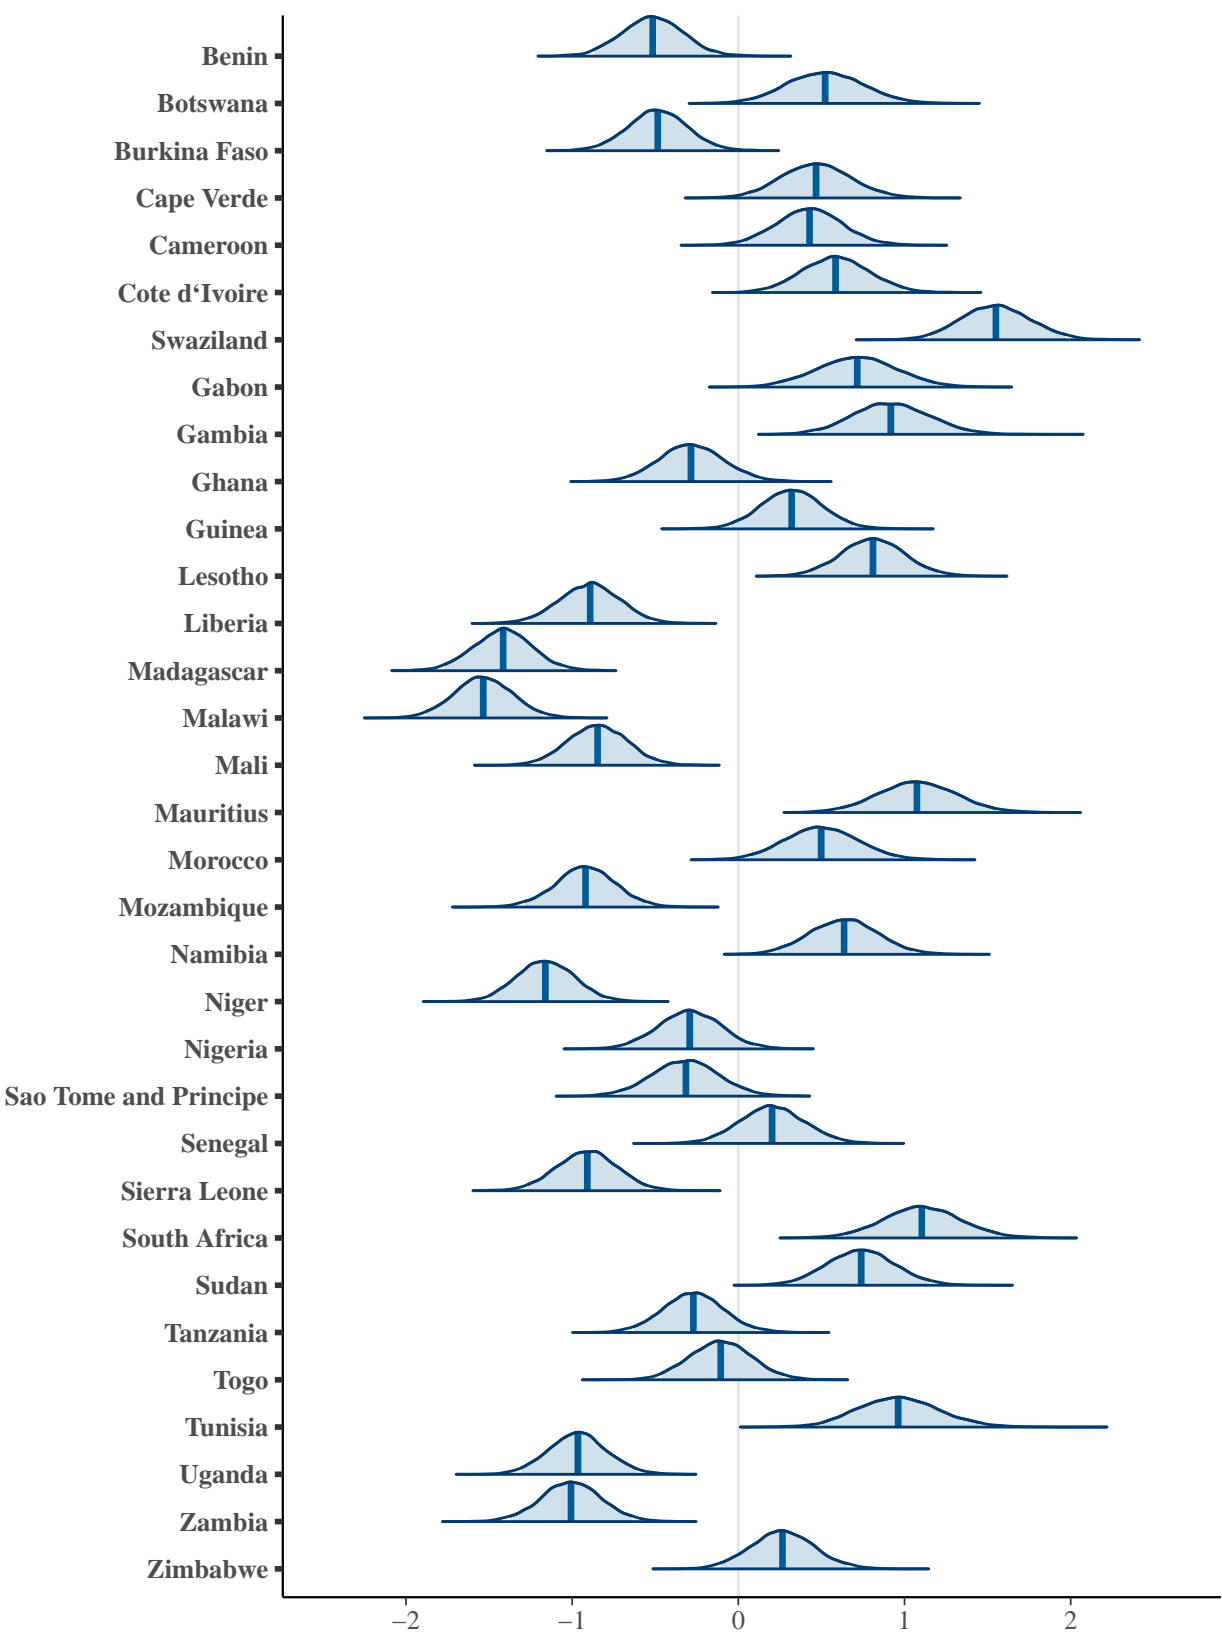

Supplement: supp [file elife-79615-supp-v1.zip › elife_poa_e79615_Figure_4_figure_supplement_1.pdf]

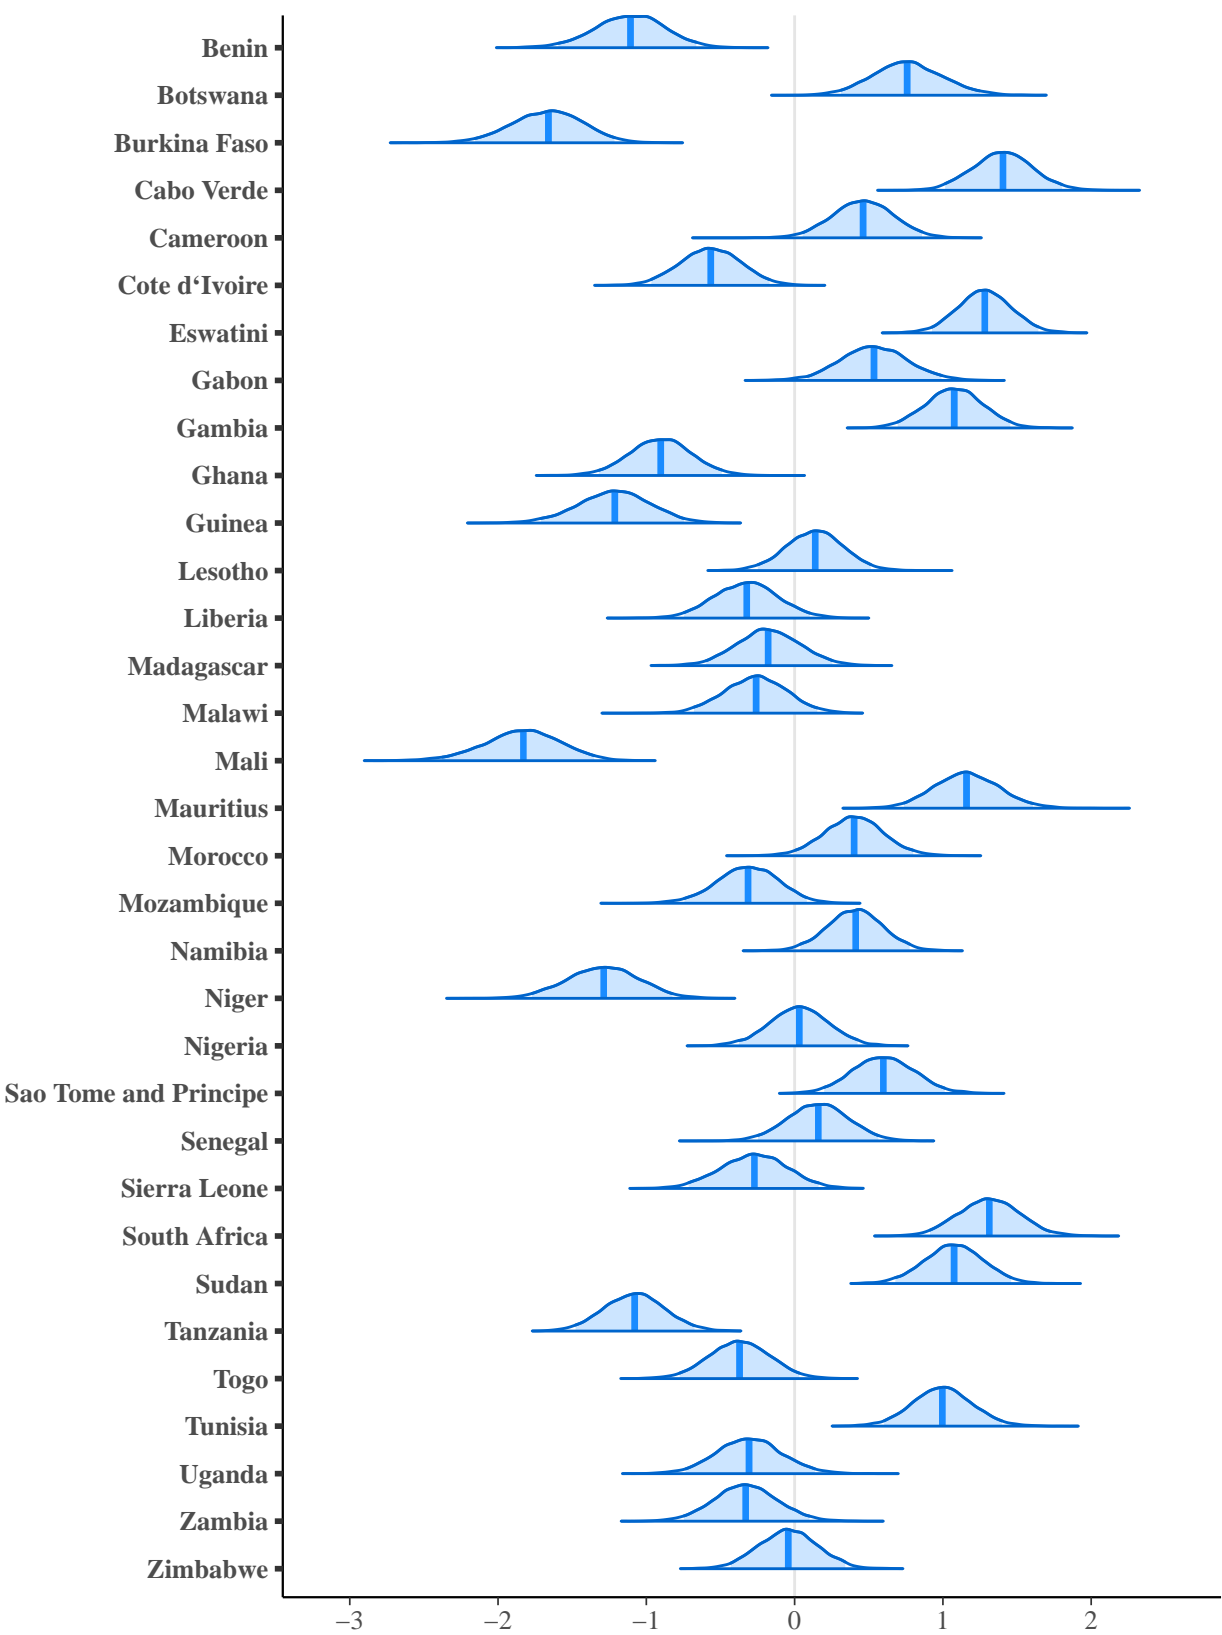

Supplement: supp [file elife-79615-supp-v1.zip › elife_poa_e79615_Figure_4_figure_supplement_2.pdf]

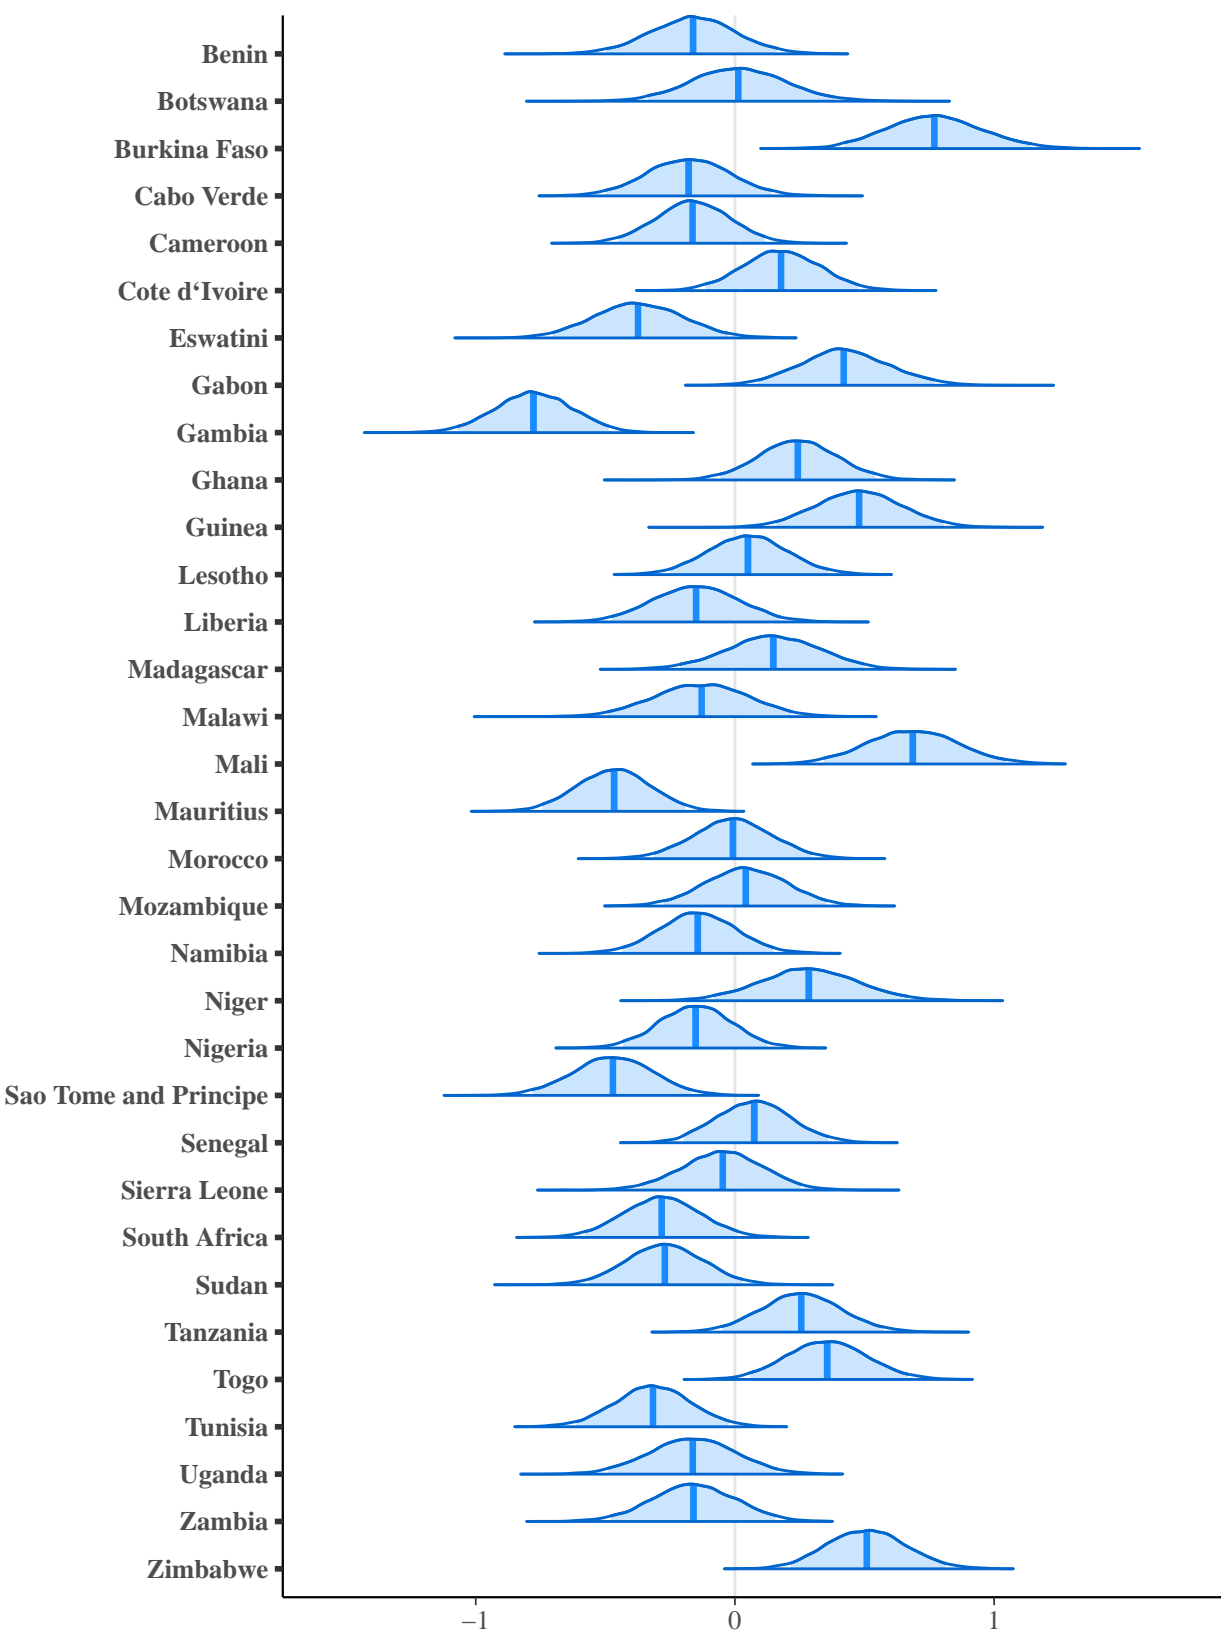

Supplement: supp [file elife-79615-supp-v1.zip › elife_poa_e79615_Figure_4_figure_supplement_3.pdf]

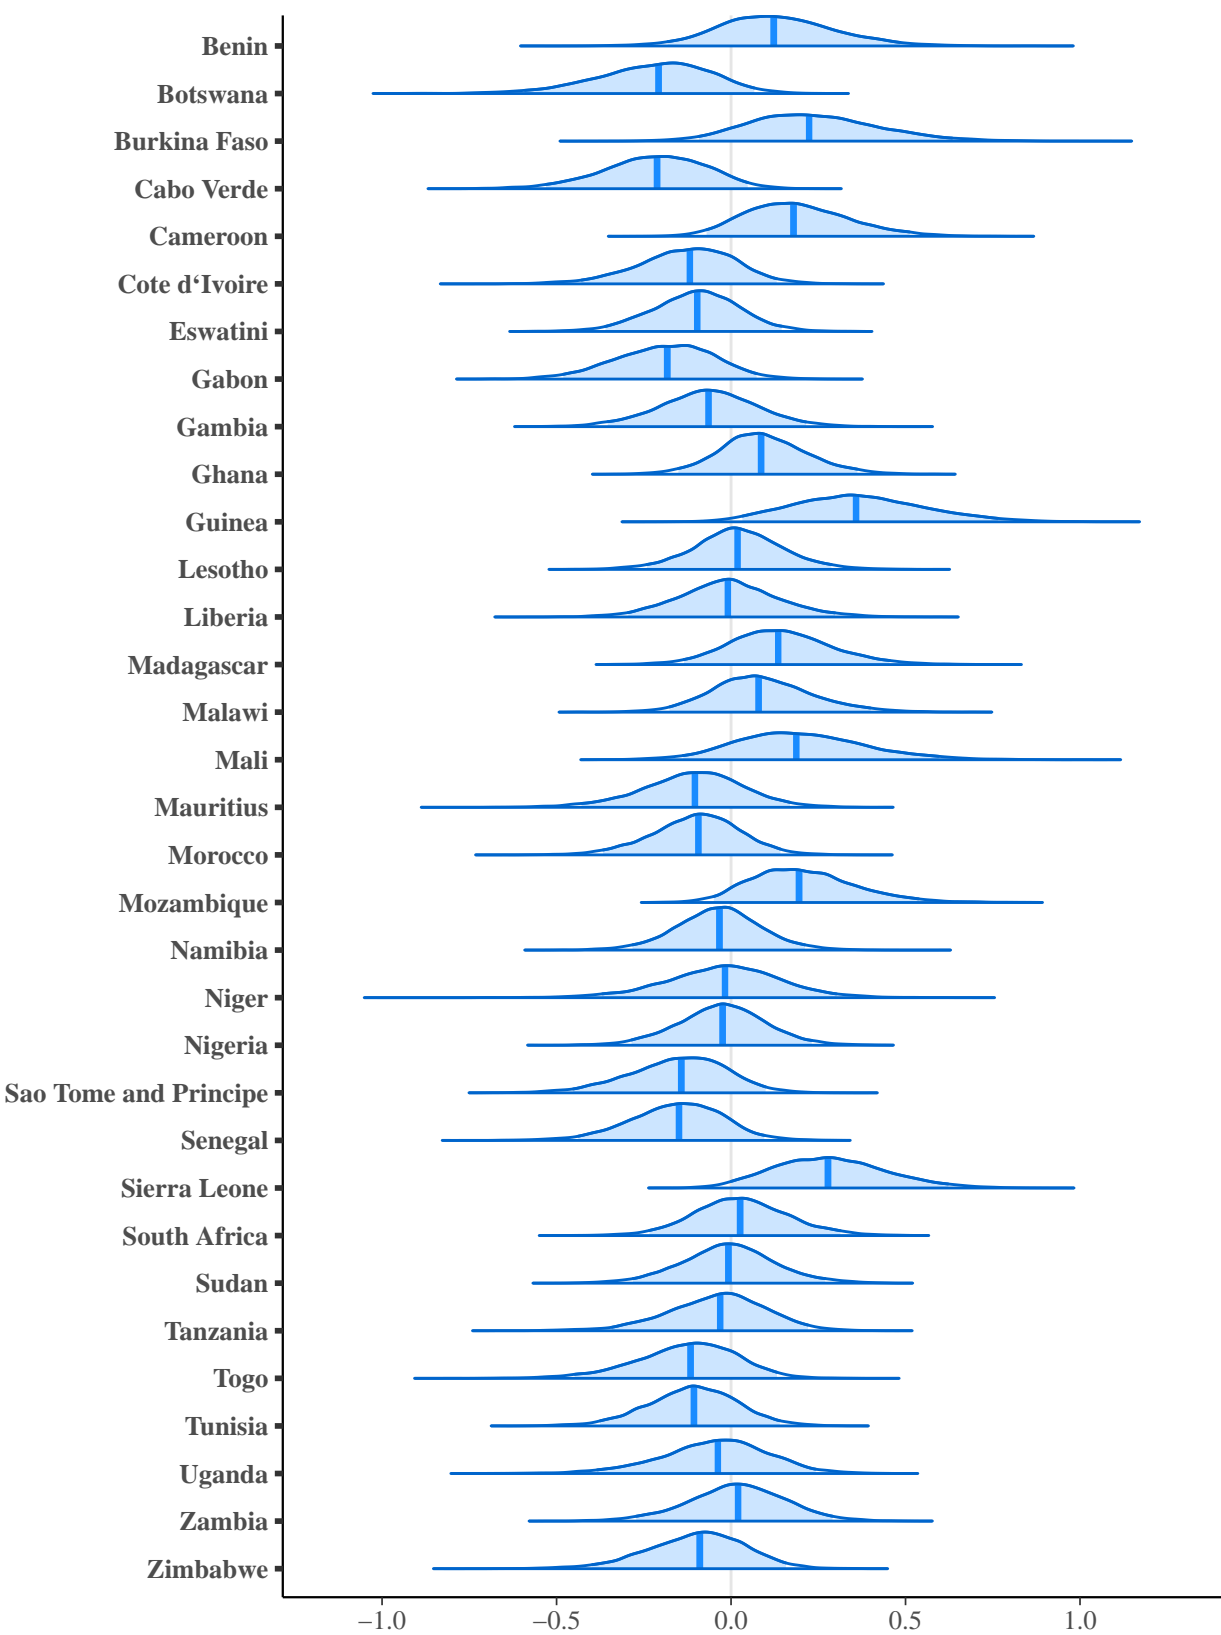

Supplement: supp [file elife-79615-supp-v1.zip › elife_poa_e79615_Figure_4_figure_supplement_4.pdf]

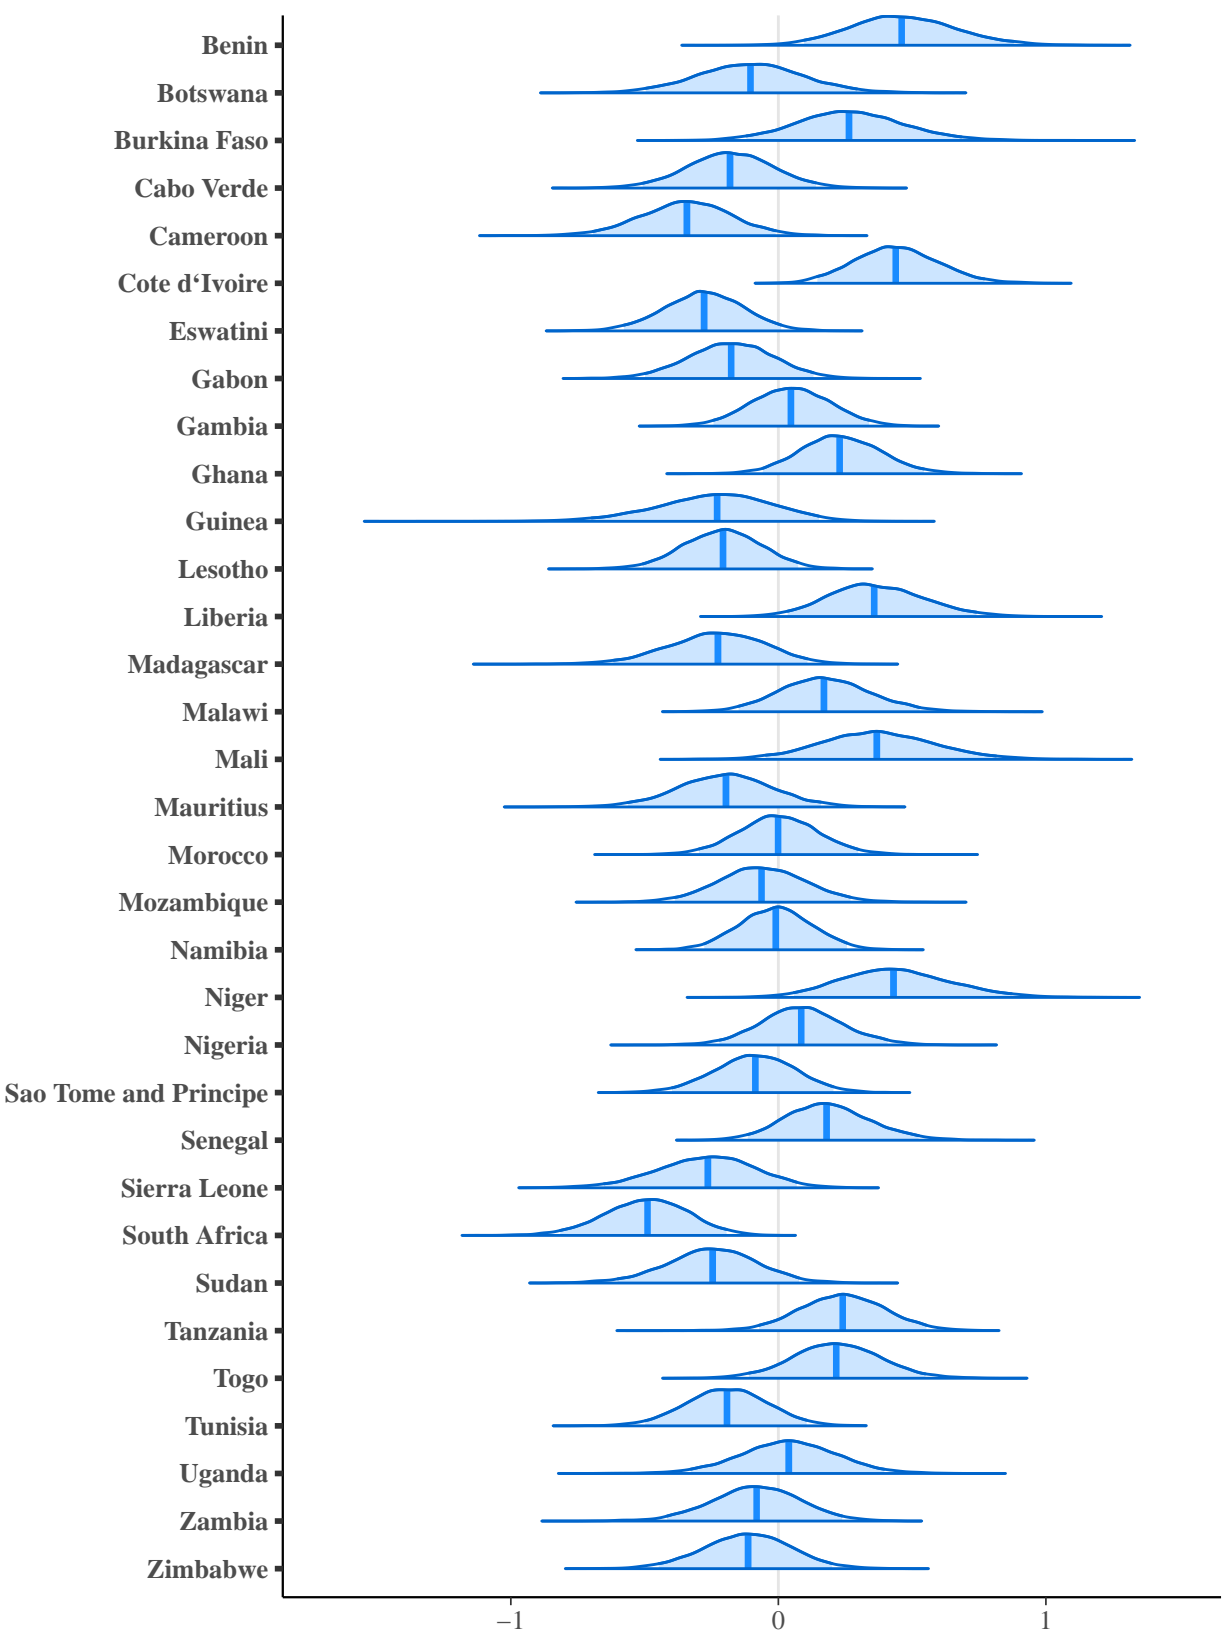

Supplement: supp [file elife-79615-supp-v1.zip › elife_poa_e79615_Figure_4_figure_supplement_5.pdf]

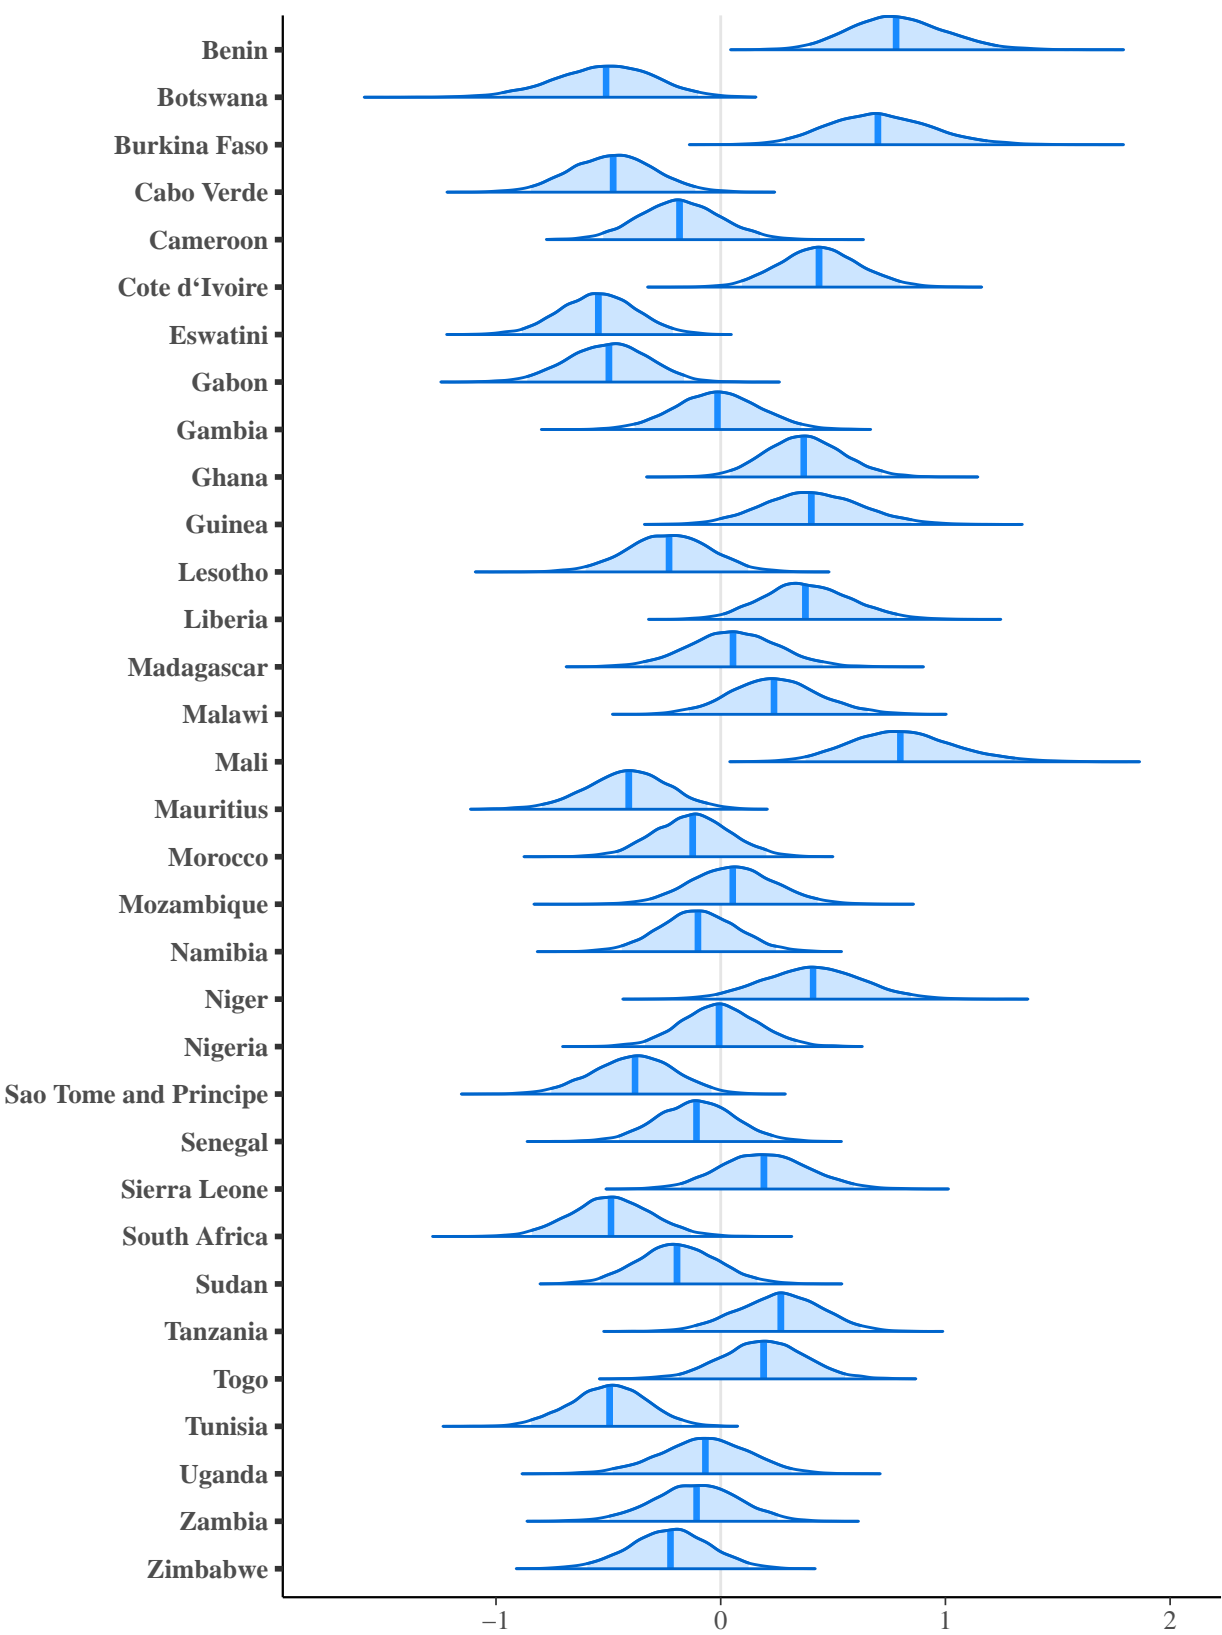

Supplement: supp [file elife-79615-supp-v1.zip › elife_poa_e79615_Figure_4_figure_supplement_6.pdf]

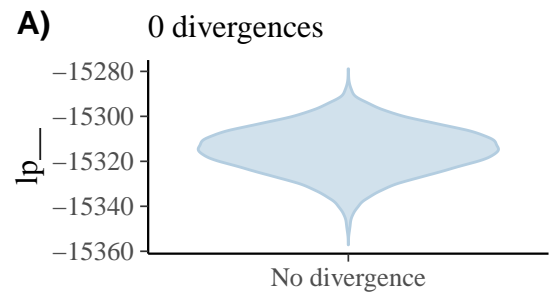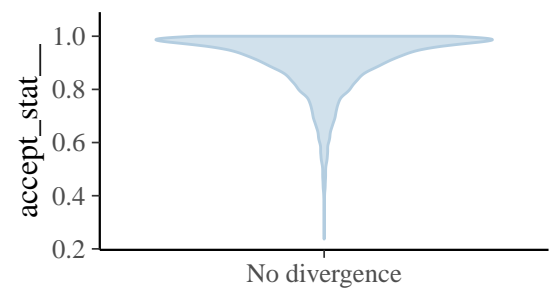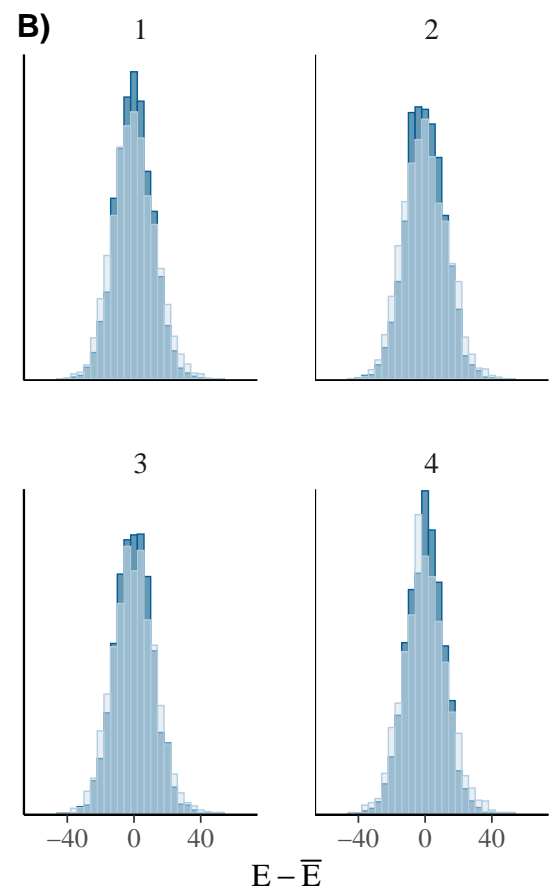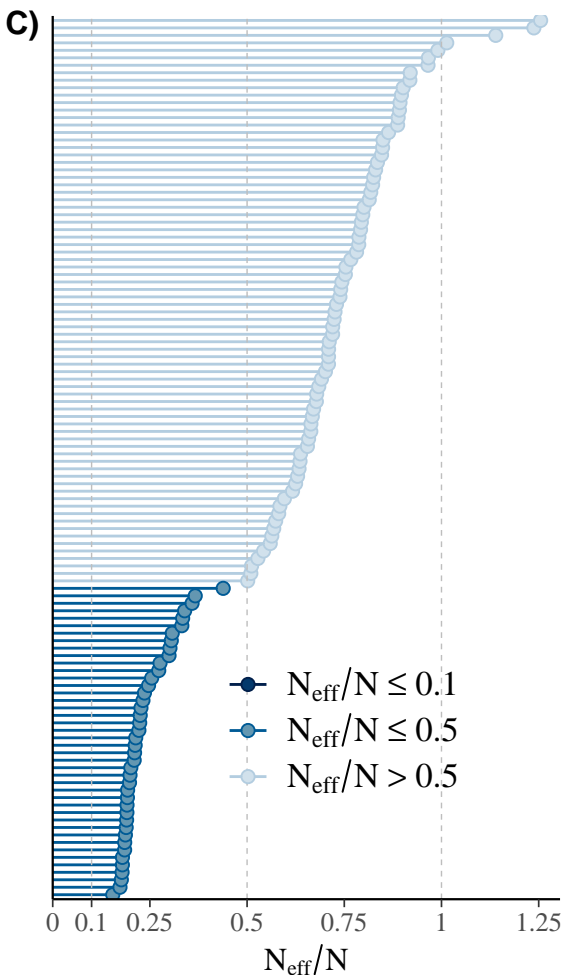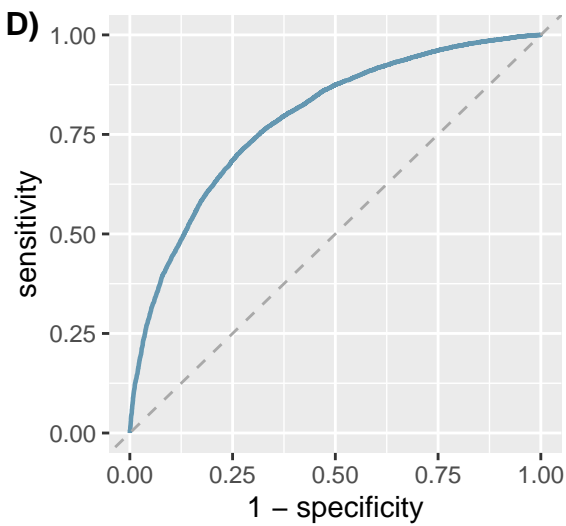

Supplement: supp [file elife-79615-supp-v1.zip › elife_poa_e79615_Figure_4_figure_supplement_7.pdf]

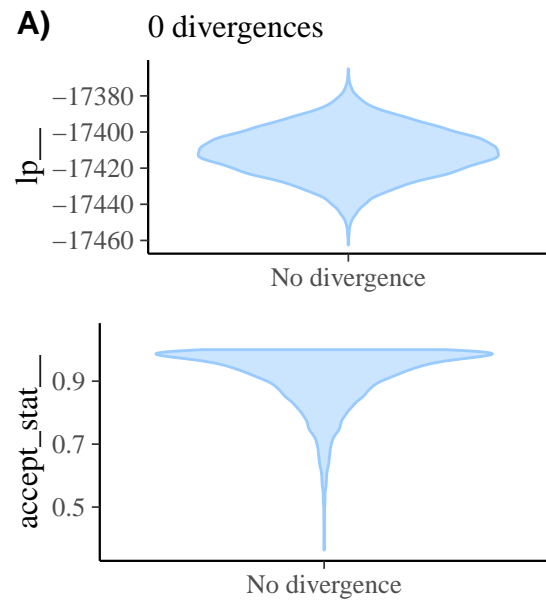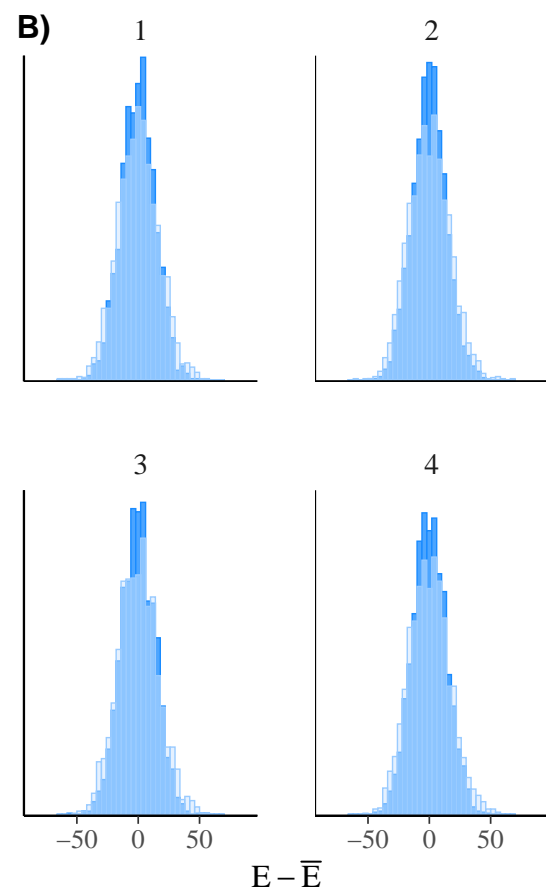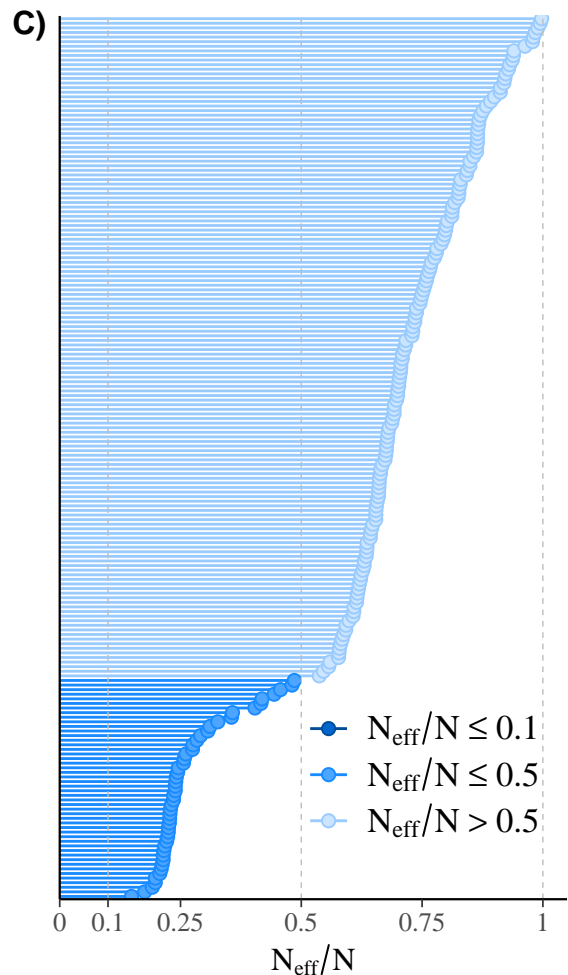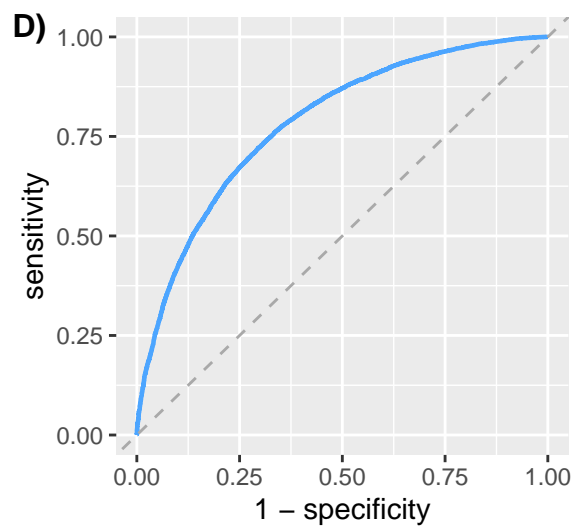

Supplement: supp [file elife-79615-supp-v1.zip › elife_poa_e79615_Figure_4_figure_supplement_8.pdf]
